# Supplementary material for: A Model for a Correlated Random Walk Based on the Ordered Extension of Pseudopodia
Source: PubMed Central journal article supplement (PMC2920832; doi:10.1371/journal.pcbi.1000874), 2010-08-12
Supplement: pcbi.1000874.s002.pdf [file pcbi.1000874.s002.pdf]

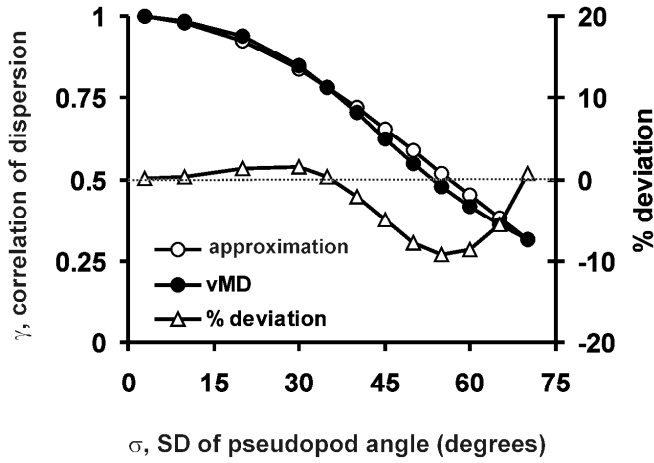

**Figure S2. Analysis of the noise equation**  $\langle \cos(0, \kappa) \rangle \approx [\cos(\frac{\sigma_\phi}{\sqrt{\pi/2}})]^2$

Pseudopodia are extended with a variance  $\sigma_\phi^2$ . In this equation, the notation  $\langle \cos(0, \kappa) \rangle$  is the average of the cosines of the angles on a circle with weights given by the von Mises Probability Distribution (vMD) with mean of 0 degrees and variance given by  $\kappa = 1/\sigma_\phi^2$ . The figure reveals that  $\langle \cos(0, \kappa) \rangle$  deviates less than 2% from the simple expression  $[\cos(\frac{\sigma_\phi}{\sqrt{\pi/2}})]^2$  for values of  $\sigma_\phi < 40$  degrees.
